# Supplementary material for: Kinematic profiles suggest differential control processes involved in bilateral in-phase and anti-phase movements
Source: PubMed Central journal article supplement (PMC6397147; doi:10.1038/s41598-019-40295-1), 2019-03-01
Supplement: 41598_2019_40295_MOESM1_ESM.pdf [file 41598_2019_40295_MOESM1_ESM.pdf]

## Supplementary Information

### **Kinematic profiles suggest differential control processes involved in bilateral in-phase and anti-phase movements**

**Pei-Cheng Shih<sup>1</sup>, Christopher J. Steele<sup>1,2</sup>, Vadim Nikulin<sup>1</sup>, Arno Villringer<sup>1,3</sup>, Bernhard Sehm<sup>1,3,\*</sup>**

<sup>1</sup> Department of Neurology, Max Planck Institute for Human Cognitive and Brain Sciences, Leipzig, Germany

<sup>2</sup> Department of Psychology, Concordia University, Montreal, Quebec, Canada

<sup>3</sup> Department of Cognitive Neurology, University of Leipzig, Leipzig, Germany

\* sehm@cbs.mpg.de

## Supplementary material 1. Power estimation

We conducted a power analysis to examine how effect size relates to the minimum sample size required for a given power and an alpha of 0.05. Most of the previous studies on bilateral coordination had a sample size between 8 to 16 participants and an effect size between 0.65 to 0.85 in the main result. However, this would provide a meager statistical power regardless if effect size is high (>0.8) or moderate (0.5 - 0.8). On the other hand, a sample size at 30 results in a high power. Therefore, our sample size allowed us to detect differences between movement conditions within a subject that may have been previously missed.

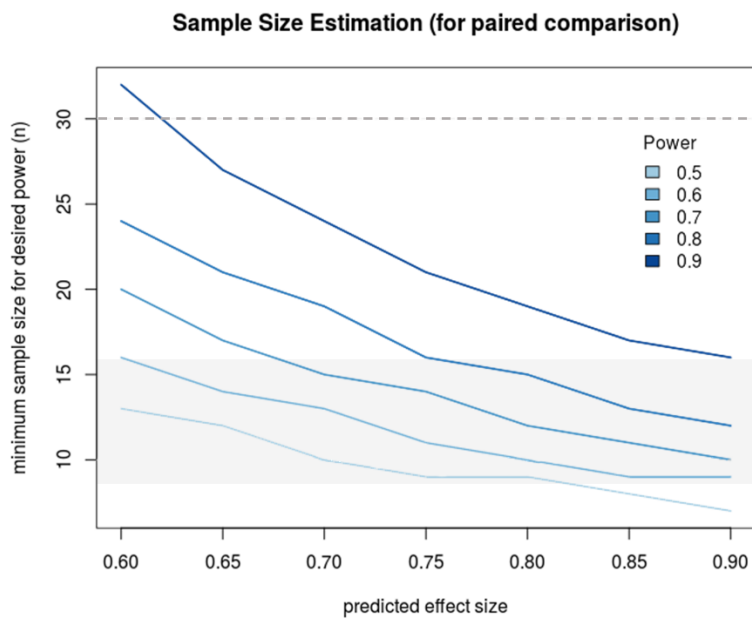

## Supplementary material 2. Participants' performance across blocks of task execution.

### Radial variability

A one-way repeated-measure ANOVA was used to determine the effect of BLOCK on each condition/hand. As shown in the figure below, no learning effects were found in both anti-phase and in-phase conditions, and in left and right hand performance.

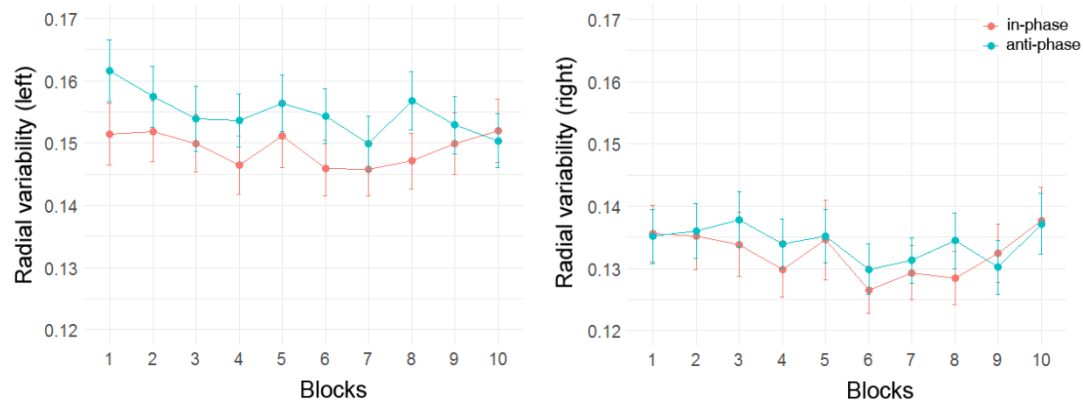

| Condition               | Statistical result                                     |
|-------------------------|--------------------------------------------------------|
| Anti-phase (left hand)  | $F_{(9,261)} = 1.001$ , $p = 0.439$ , $\eta^2 = 0.033$ |
| Anti-phase (right hand) | $F_{(9,261)} = 1.604$ , $p = 0.114$ , $\eta^2 = 0.052$ |
| In-phase (left hand)    | $F_{(9,261)} = 1.540$ , $p = 0.161$ , $\eta^2 = 0.050$ |
| In-phase (right hand)   | $F_{(9,261)} = 1.868$ , $p = 0.090$ , $\eta^2 = 0.061$ |

### Synchronization index

We performed one-way repeated-measure ANOVA was used to determine the effect of BLOCK on anti-phase and in-phase movements respectively. No learning effects were found across the blocks in both anti-phase and in-phase conditions as shown in the figure below.

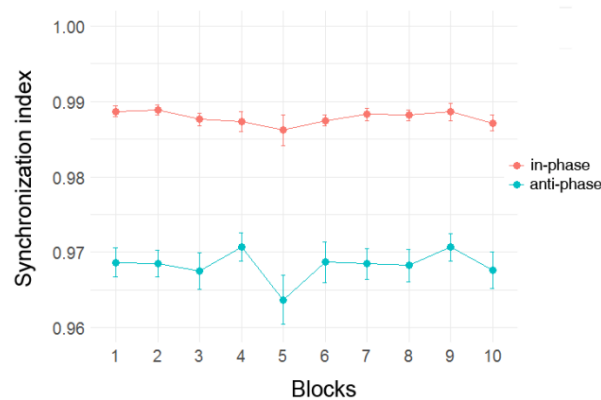

| Condition  | Statistical result                                     |
|------------|--------------------------------------------------------|
| Anti-phase | $F_{(9,261)} = 1.604$ , $p = 0.114$ , $\eta^2 = 0.052$ |
| In-phase   | $F_{(9,261)} = 1.047$ , $p = 0.403$ , $\eta^2 = 0.035$ |

### Supplementary material 3. Comparison of clockwise and counterclockwise movement directions.

#### Radial variability

| Unilateral condition | Clockwise   | Counterclockwise | Paired-t test       |
|----------------------|-------------|------------------|---------------------|
| Left hand            | 0.166±0.033 | 0.144±0.024      | t=6.1201, p<0.001   |
| Right hand           | 0.134±0.026 | 0.138±0.032      | t=-2.4314, p=0.0263 |

| Anti-phase condition | Bilateral clockwise | Bilateral counterclockwise | Paired-t test       |
|----------------------|---------------------|----------------------------|---------------------|
| Left hand            | 0.161±0.032         | 0.155±0.021                | t=2.4938, p=0.0186  |
| Right hand           | 0.137±0.025         | 0.137±0.031                | t= 0.1767, p=0.8617 |

| In-phase condition | left clockwise / right counterclockwise | left counterclockwise / right clockwise | Paired-t test      |
|--------------------|-----------------------------------------|-----------------------------------------|--------------------|
| Left hand          | 0.158±0.033                             | 0.142±0.022                             | t=5.3041, p<0.001  |
| Right hand         | 0.136±0.032                             | 0.134±0.028                             | t=1.0794, p=0.2893 |

#### Synchronization index

| Anti-phase condition  | Bilateral clockwise | Bilateral counterclockwise | Paired-t test        |
|-----------------------|---------------------|----------------------------|----------------------|
| Synchronization index | 0.965±0.001         | 0.963±0.001                | t= -1.6214, p=0.1158 |

| In-phase condition    | left clockwise / right counterclockwise | left counterclockwise / right clockwise | Paired-t test        |
|-----------------------|-----------------------------------------|-----------------------------------------|----------------------|
| Synchronization index | 0.984±0.001                             | 0.985±0.001                             | t= -1.1266, p=0.2692 |

**Supplementary material 4. Centroid offset during the in-phase and anti-phase conditions**

| Centroid offset | Left hand     | Right hand    |
|-----------------|---------------|---------------|
| Anti-phase      | 0.789±0.1270  | 0.6760±0.1228 |
| In-phase        | 0.7273±0.1305 | 0.6591±0.1190 |

2x2 repeated-measured ANOVA

|                | F-value | P-value |
|----------------|---------|---------|
| CONDITION*SIDE | 4.4865  | <0.0360 |
| CONDITION      | 13.904  | 0.0003  |
| SIDE           | 74.225  | <0.001  |

**Supplementary material 5. Supplementary Material 4. Comparison of phase synchronization index and standard deviation of the relative phase difference**

Phase synchronization

| Cond       | Mean ± SD | t     | P      |
|------------|-----------|-------|--------|
| In-phase   | 0.98±.001 | 8.276 | <0.001 |
| Anti-phase | 0.96±.001 |       |        |

SD of the relative phase difference

| Cond       | Mean ± SD  | t     | P      |
|------------|------------|-------|--------|
| In-phase   | 9.69±6.03  | 5.205 | <0.001 |
| Anti-phase | 14.33±2.93 |       |        |
